# Supplementary material
Source: PubMed Central journal article supplement (PMC2291399)
Supplement: mbc_E07-11-1110_1.pdf [file mbc_E07-11-1110_1.pdf]

## Supplementary Information

### ***The *ume6 Δ/ume6Δ* mutant is partially defective for biofilm formation***

The ability of *C. albicans* to form biofilms on both inert and biological substrates is particularly problematic for patients undergoing treatment for candidiasis since *C. albicans* biofilms are highly resistant to antifungal drugs and can form on catheters during intravenous therapy (Ramage *et al.*, 2006). In order to determine the effect of the *ume6Δ/Δ* mutation on this important process we measured 24-hour biofilm formation of wild-type, *ume6Δ/+*, *ume6Δ/ume6Δ* and *ume6Δ/ume6Δ::UME6* strains on polystyrene wells using a colorimetric XTT-reduction assay (see Methods). As shown in Figure S1, the *ume6Δ/ume6Δ* mutant showed a partial, but significant defect in *C. albicans* biofilm formation. This defect appeared to be the result of a loss of *UME6* function since the *ume6Δ/ume6Δ::UME6* add-back strain formed biofilms at a level equivalent to that of *ume6Δ/+* and wild-type strains.

These results are consistent with earlier studies which have indicated that filamentation is important for *C. albicans* biofilm formation (Ramage *et al.*, 2005). Microscopic examination revealed that biofilms formed by the *ume6 Δ/ume6Δ* mutant contained short, stubby filaments. In contrast, wild-type *C. albicans* biofilms contain extended hyphal filaments. Our results suggest that hyphal filament extension may be specifically important for *C. albicans* to achieve complete biofilm formation at least on an inert substrate.

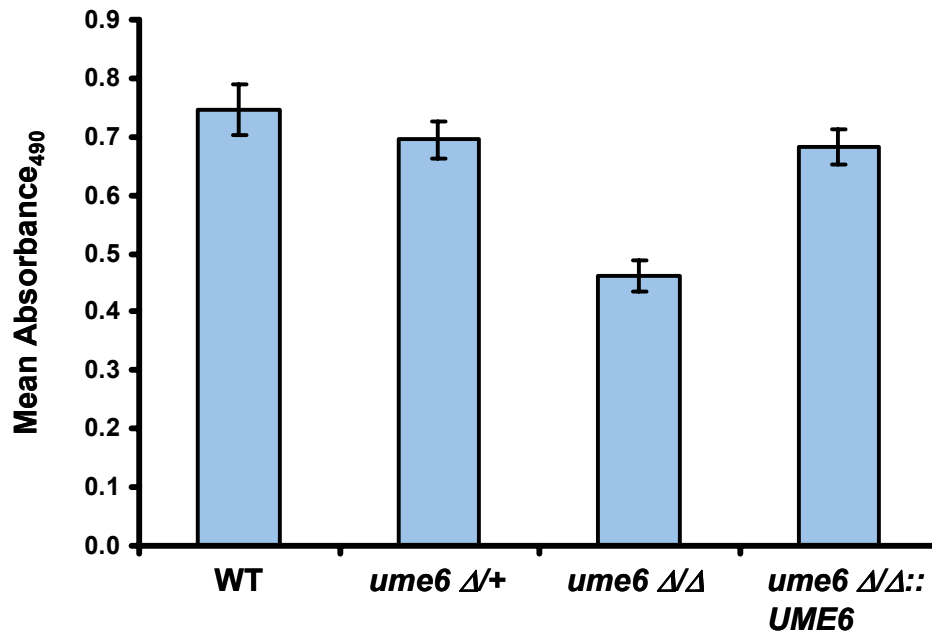

**Figure S1.** Partial defect in biofilm formation by the *ume6*Δ/Δ mutant. 24-hour biofilm formation of the indicated strains on polystyrene wells following growth at 37°C in RPMI medium was measured by an XTT reduction assay. Values represent the mean absorbance (at 420 nm) measured from 22 independent biofilms for each strain (error bars indicate standard deviation).

## Methods

24-hour biofilm formation following growth at 37°C in RPMI medium was measured on polystyrene wells using an XTT-reduction assay as described previously (Ramage *et al.*, 2001).

## References

Ramage, G., Martinez, J.P., and Lopez-Ribot, J.L. (2006). Candida biofilms on implanted biomaterials: a clinically significant problem. *FEMS Yeast Res* 6, 979-986.

Ramage, G., Saville, S.P., Thomas, D.P., and Lopez-Ribot, J.L. (2005). Candida biofilms: an update. *Eukaryot Cell* 4, 633-638.

Ramage, G., Vande Walle, K., Wickes, B.L., and Lopez-Ribot, J.L. (2001). Standardized method for in vitro antifungal susceptibility testing of *Candida albicans* biofilms. *Antimicrob Agents Chemother* 45, 2475-2479.

**Table S1****Primers used in this study**

| #  | Primer Name | Sequence                                            | Description                                                                                  |
|----|-------------|-----------------------------------------------------|----------------------------------------------------------------------------------------------|
| 1  | DKO225      | CTTTGCTTTACATAATTGGTGATAGG                          | <i>UME6</i> 5' flank upstream for fusion PCR                                                 |
| 2  | DKO226      | cacggcgcgcctagcagcggCTAATTGGAAGTAA<br>ATTGAGGATATTG | <i>UME6</i> 5' flank downstream for fusion PCR                                               |
| 3  | DKO229      | gtcagcggccgcacccctgcAAGAATTAACAGGTT<br>GACGGTTG     | <i>UME6</i> 3' flank upstream for fusion PCR                                                 |
| 4  | DKO230      | CGGGAAAAGTTGCAAGAGTTGGTG                            | <i>UME6</i> 3' flank downstream for fusion PCR                                               |
| 5  | RZO37       | ccgctgctaggcgcgccgtgACCAGTGTGATGGAT<br>ATCTGC       | 5' vector primer for <i>LEU2</i> , <i>ARG4</i> , <i>HIS1</i> markers (designed by R. Zordan) |
| 6  | RZO38       | gcagggatgcggccgctgacAGCTCGGATCCACTA<br>GTAACG       | 3' vector primer for <i>LEU2</i> , <i>ARG4</i> , <i>HIS1</i> markers (designed by R. Zordan) |
| 7  | DKO414      | gcatgaactcgagggatccGAGAGTTTTAATCAAT<br>TAGAAACC     | 5' primer for <i>UME6</i> add-back                                                           |
| 8  | DKO419      | tcgaacctggatccctcgagGGAATGAGTTACAG<br>TTTATCGGG     | 3' primer for <i>UME6</i> add-back                                                           |
| 9  | MBO13       | AGCTAGCAATGAACCAAACGG                               | 5' <i>NRG1</i> flank upstream primer for $\Delta nrg1::ARG4$ fusion                          |
| 10 | MBO14       | cacggcgcgcctagcagcggGATTCTTAATGAAAC<br>TAGCAGGG     | 5' <i>NRG1</i> flank downstream primer for $\Delta nrg1::ARG4$ fusion                        |
| 11 | MBO15       | gtcagcggccgcacccctgcTGGATGGTTAATTGC<br>TTGGG        | 3' <i>NRG1</i> flank upstream primer for $\Delta nrg1::ARG4$ fusion                          |
| 12 | MBO16       | AGGAGAGAAGATCTATGGCAATGC                            | 3' <i>NRG1</i> flank downstream primer for $\Delta nrg1::ARG4$ fusion                        |
| 13 | MBO5        | tagctaaggtaccAGCTAGCAATGAACCAAAC<br>GG              | 5' <i>NRG1</i> flank upstream primer for cloning into pSFS2                                  |

|    |        |                                                 |                                                                             |
|----|--------|-------------------------------------------------|-----------------------------------------------------------------------------|
| 14 | MBO6   | agtcgatctcgagGATTCTTAATGAAACTAGCA<br>GGG        | 5' <i>NRG1</i> flank downstream<br>primer for cloning into<br>pSFS2         |
| 15 | MBO7   | tacgttagcggccgcTGGATGGTTAATTGCTTGG<br>G         | 3' <i>NRG1</i> flank upstream<br>primer for cloning into<br>pSFS2           |
| 16 | MBO8   | gtcgataccgcggAGGAGAGAAGATCTATGGC<br>AATGC       | 3' <i>NRG1</i> flank downstream<br>primer for cloning into<br>pSFS2         |
| 17 | DKO491 | TACAACCACCAACACATCCC                            | 5' <i>RFG1</i> flank upstream<br>primer for $\Delta rfg1::ARG4$<br>fusion   |
| 18 | DKO493 | cacggcgcgcctagcagcggAATGGTGTGATGGTT<br>TGC      | 5' <i>RFG1</i> flank downstream<br>primer for $\Delta rfg1::ARG4$<br>fusion |
| 19 | DKO495 | gtcagcggccgcacccctgcTAGATACATATGAAT<br>TGAACC   | 3' <i>RFG1</i> flank upstream<br>primer for $\Delta rfg1::ARG4$<br>fusion   |
| 20 | DKO497 | TGCTCAAGCGTGCACACACC                            | 3' <i>RFG1</i> flank downstream<br>primer for $\Delta rfg1::ARG4$<br>fusion |
| 21 | DKO492 | actgacctgagaggtaccTACAACCACCAACACA<br>TCCC      | 5' <i>RFG1</i> flank upstream<br>primer for cloning into<br>pSFS2           |
| 22 | DKO494 | tgcgatgaacgatctcgagAATGGTGTGATGGTTTG<br>C       | 5' <i>RFG1</i> flank downstream<br>primer for cloning into<br>pSFS2         |
| 23 | DKO496 | agactgatcgtagcgcggccgcTAGATACATATGA<br>ATTGAACC | 3' <i>RFG1</i> flank upstream<br>primer for cloning into<br>pSFS2           |
| 24 | DKO498 | caggtgacctctccgcggtGCTCAAGCGTGCACAC<br>ACC      | 3' <i>RFG1</i> flank downstream<br>primer for cloning into<br>pSFS2         |
| 25 | DKO531 | gatcactgacgtgactgcagTAGAATTTCCCGGGA<br>GTTGC    | 5' <i>UME6</i> flank upstream<br>primer for cloning into<br>pBB510          |
| 26 | DKO532 | tgcgatgaacgatgatccCTAATTGGAAGTAAATT<br>GAGG     | 5' <i>UME6</i> flank downstream<br>primer for cloning into<br>pBB510        |

|    |        |                                                  |                                                                      |
|----|--------|--------------------------------------------------|----------------------------------------------------------------------|
| 27 | DKO533 | agactgatcgtacgatagatctaCAGGTTGACGGTTG<br>ACGGTGG | 3' <i>UME6</i> flank upstream<br>primer for cloning into<br>pBB510   |
| 28 | DKO534 | caggtgacctctggtaccCGGGAAAAGTTGCAAG<br>AGTTGGTG   | 3' <i>UME6</i> flank downstream<br>primer for cloning into<br>pBB510 |
| 29 | DKO433 | accaaacggtaCCTAGAATTTCCCGGGAGTTG<br>C            | 5' <i>UME6</i> flank upstream<br>primer for cloning into<br>pSFS2    |
| 30 | DKO527 | tgc atgaacgatctcgagCTAATTGGAAGTAAATT<br>GAGG     | 5' <i>UME6</i> flank downstream<br>primer for cloning into<br>pSFS2  |
| 31 | DKO528 | agactgatcgtacgatcggcgcaCAGGTTGACGGT<br>TGACGGTGG | 3' <i>UME6</i> flank upstream<br>primer for cloning into<br>pSFS2    |
| 32 | DKO529 | caggtgacctctccgaggCGGGAAAAGTTGCAAG<br>AGTTGGTG   | 3' <i>UME6</i> flank downstream<br>primer for cloning into<br>pSFS2  |
| 33 | DKO400 | GACATATTGACCGACATAAT                             | 5' WT <i>ARG4</i> add-back<br>primer                                 |
| 34 | DKO401 | CTAATGACTGAATTTGATGTA                            | 3' WT <i>ARG4</i> add-back<br>primer                                 |
| 35 | DKO408 | GAGGAGACAGAAGTTAGTAG                             | 5' WT <i>HIS1</i> add-back primer                                    |
| 36 | DKO409 | TATGGTGCTCATGGCTACGC                             | 3' WT <i>HIS1</i> add-back primer                                    |
| 37 | DKO523 | GTTGACCGAAGCTCCAATGAATCC                         | 5' primer for <i>ACT1</i> probe                                      |
| 38 | DKO526 | CAGCAATACCTGGGAACATGG                            | 3' primer for <i>ACT1</i> probe                                      |
| 39 | DKO239 | GTTGGGACTAGGATTGGTAAAGC                          | 5' primer for <i>UME6</i> probe                                      |
| 40 | DKO240 | GATGTGGAGTAGACTTGGATAATGG                        | 3' primer for <i>UME6</i> probe                                      |
| 41 | DTO15  | GACCAAGCACCTACTGTTCC                             | 5' primer for <i>ECE1</i> probe                                      |
| 42 | DTO16  | GATCTAGTAATGAGTTGTGG                             | 3' primer for <i>ECE1</i> probe                                      |
| 43 | DTO17  | CAACTGAACAAAGCATCACG                             | 5' primer for <i>HYR1</i> probe                                      |
| 44 | DTO18  | CCTTCAGAACCTTCAGTTGAACCG                         | 3' primer for <i>HYR1</i> probe                                      |
| 45 | DTO19  | CAGGAAGAACCTTGTGATTACC                           | 5' primer for <i>HWPI</i> probe                                      |

|    |       |                           |                                 |
|----|-------|---------------------------|---------------------------------|
| 46 | DTO20 | GTTGGAACAGAAGTGTTTGG      | 3' primer for <i>HWP1</i> probe |
| 47 | DTO23 | GTGAAGAACATACCTATGG       | 5' primer for <i>RBT4</i> probe |
| 48 | DTO24 | GTCCTTACCAGCTTCTTCG       | 3' primer for <i>RBT4</i> probe |
| 49 | DTO21 | GAGAGAAGCTGAAATTGCC       | 5' primer for <i>RBT1</i> probe |
| 50 | DTO22 | GGCTTTGACTTGAGCATTG       | 3' primer for <i>RBT1</i> probe |
| 51 | DK258 | CAACAATCACCTCACTTGCAACCC  | 5' primer for <i>NRG1</i> probe |
| 52 | DK251 | GCTTCTAAAGTCCTGTGTTGTTGTC | 3' primer for <i>NRG1</i> probe |

Note: Lowercase bases indicate flanking sequences within primers that either contain restriction sites for cloning or were used as annealing sequences for fusion PCR fragments.
